# Supplementary material for: ZIF-67/BiOCl nanocomposites for highly efficient detection of NO2gas at room temperature
Source: Royal Society of Chemistry journal article supplement (doi:10.1039/d3ta01564e), 2023-01-01
Supplement: d3ta01564e1.pdf [file d3ta01564e1.pdf]

# Support Information

## ZIF-67/BiOCl nanocomposite for highly efficient detection of NO<sub>2</sub> gas at Room temperature

Jiahui Fan<sup>a</sup>, Lin Jiang<sup>a</sup>, He Lv<sup>a</sup>, Fangjie Qin<sup>a</sup>, Yihe Fan<sup>a</sup>, Jue Wang<sup>a</sup>, Muhammad Ikram<sup>b, \*</sup>, Keying Shi<sup>a, \*</sup>

- a. Key Laboratory of Functional Inorganic Material Chemistry, Ministry of Education. School of Chemistry and Material Science, Heilongjiang University, Harbin, 150080, P. R. China.
- b. Zhengzhou Research Institute, Harbin Institute of Technology, Zhengzhou 450000, China.
- c. School of Mechanical and Electronic Engineering, Qingdao Binhai University, Qingdao 266555, Shandong, P.R. China

\* Corresponding author

Corresponding author: Tel: +86 451 86609141; +86 451 86604920

E-mail: ikram@hit.edu.cn

E-mail: shikeying2008@163.com

Fax: +86 4518667 3647; Tel: +86 451 8660 9141

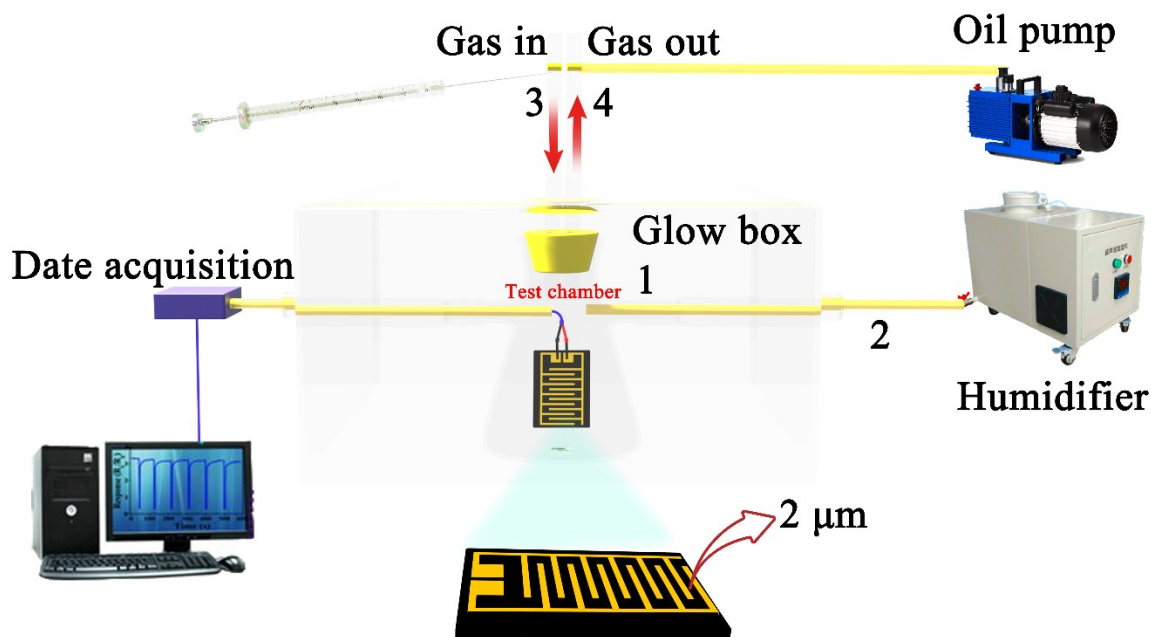

**Scheme S1** Diagram of the sensing process for the gas transportation system.

## Materials

All reagents are of analytical grade and have not been further purified. Bismuth nitrate pentahydrate ( $\text{Bi}(\text{NO}_3)_3 \cdot 5\text{H}_2\text{O}$ , 99%) was purchased from Sinopharm Chemical Reagent Co., Ltd. Cobalt nitrate hexahydrate ( $\text{Co}(\text{NO}_3)_2 \cdot 6\text{H}_2\text{O}$ , 99%) and Ethylene glycol (EG) were purchased from Xilong Chemical Co., Ltd. Methanol ( $\text{CH}_3\text{OH}$ ) was purchased from Tianjin Fuyu Fine Chemical Co., Ltd. Anhydrous ethanol ( $\text{C}_2\text{H}_5\text{OH}$ ) and Hexadecyltrimethylammonium bromide (CTAB) was purchased from Tianjin Comio Chemical Reagent Co., Ltd. 2-Methylimidazole and Poly(diene dimethyl ammonium chloride) solution (PDDA) were purchased from Shanghai Aladdin Biochemical Technology Co., Ltd.

**Table S1.** The comparison of present work on ZIF-67/BiOCl nanocomposite with the reported literatures.

| Materials                                                                       | Gas             | W. T. (°C) | Gas Conc. (ppm) | T <sub>res</sub> /T <sub>rec</sub> (s) | Sensitivity (R <sub>a</sub> /R <sub>g</sub> ) | LOD (ppm) | Ref              |
|---------------------------------------------------------------------------------|-----------------|------------|-----------------|----------------------------------------|-----------------------------------------------|-----------|------------------|
| <b>This Work</b>                                                                | NO <sub>2</sub> | RT         | 100             | 7s/86                                  | 44.81 <sup>②</sup>                            | 0.05      | <b>This Work</b> |
| Co <sub>3</sub> O <sub>4</sub> /g-C <sub>3</sub> N <sub>4</sub> (ZIF-67 drived) | NO <sub>2</sub> | RT         | 100             | 1.06/26.6                              | 17.83 <sup>②</sup>                            | 0.05      | 1                |
| SnO <sub>2</sub> /ZIF-8                                                         | NO <sub>2</sub> | 300        | 10              | 64/45                                  | 167 <sup>②</sup>                              | 0.15      | 2                |
| ZIF-8/In <sub>2</sub> O <sub>3</sub>                                            | NO <sub>2</sub> | 140        | 1               | 80/133                                 | 5.6 <sup>②</sup>                              | 0.01      | 3                |
| Au/BiOCl                                                                        | CO <sub>x</sub> | 200-300 °C | 100-400 pm      | 63.2% <sup>①</sup>                     | 9s                                            | -         | 4                |
| BiOCl                                                                           | CO              | 300-400 °C | 800 ppm         | 90% <sup>①</sup>                       | 4.3s                                          | -         | 5                |
| BiOCl                                                                           | Ethanol         | 180 °C     | 1000 ppm        | 30% <sup>①</sup>                       | -                                             | -         | 6                |
| a-C /TeO <sub>2</sub>                                                           | NO <sub>2</sub> | 50         | 10              | --                                     | 1.978 <sup>②</sup>                            | --        | 7                |
| g-C <sub>3</sub> N <sub>4</sub> @TiO <sub>2</sub>                               | NO <sub>2</sub> | RT         | 100             | 329/372                                | 19.7 <sup>②</sup>                             | 0.001     | 8                |
| Cu-MoS <sub>2</sub>                                                             | NO <sub>2</sub> | 100        | 20              | 54/82                                  | 30 <sup>②</sup>                               | 2         | 9                |
| BP microribbons                                                                 | NO <sub>2</sub> | RT         | 100             | --                                     | 66% <sup>①</sup>                              | 0.4ppb    | 10               |
| Cu <sub>2</sub> O/CuO-0.5                                                       | NO <sub>2</sub> | RT         | 10              | 23/159                                 | 82.0% <sup>①</sup>                            | 0.01      | 11               |
| WO <sub>3</sub> /WS <sub>2</sub> -300                                           | NO <sub>2</sub> | RT         | 50              | 29/489                                 | 455.3% <sup>①</sup>                           | ~5 ppb    | 12               |

W.T.: Working temperature; LOD: limit of detection; RT: Room temperature.

①:  $S = |R_a - R_g| / R_a \times 100\%$  or  $S = |R_g - R_a| / R_a \times 100\%$ ; ②:  $S = R_a / R_g$

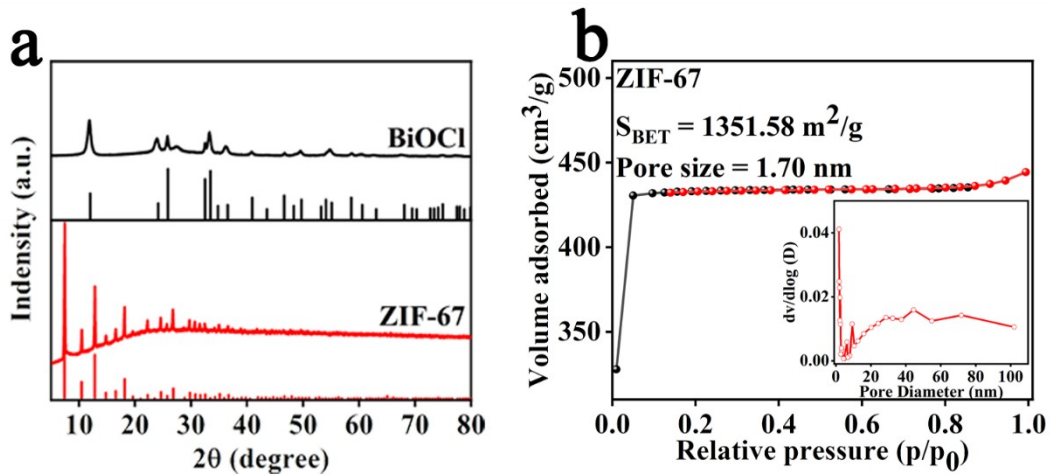

**Fig. S1** (a) XRD pattern of the pristine BiOCl NSs and ZIF-67; (b) nitrogen adsorption and desorption isotherms of as-prepared ZIF-67 (Inset shows the aperture distribution).

**Table S2** The textual characteristics of nitrogen adsorption and desorption isotherms of all ZBO.

| Samples | $S_{\text{BET}}$ ( $\text{m}^2/\text{g}$ ) | Pore size (nm) |
|---------|--------------------------------------------|----------------|
| ZIF-67  | 1351.58                                    | 1.70           |
| ZBO-1   | 1307.06                                    | 2.91           |
| ZBO-2   | 1251.02                                    | 3.62           |
| ZBO-3   | 1146.16                                    | 4.35           |

**Table S3** Assignment of the Raman bands of ZIF-67,

| Raman Bands $\text{cm}^{-1}$ | Assignment                                                                                    | Ref |
|------------------------------|-----------------------------------------------------------------------------------------------|-----|
| 423                          | Co-N                                                                                          |     |
| 684                          | Imdz ring puckering, H oop bend                                                               |     |
| 738                          | C=N oop bend, $\delta$ N-H                                                                    |     |
| 1121                         | C-H oop bend                                                                                  |     |
| 1144                         | $\nu$ C5-N                                                                                    | 13  |
| 1178                         | $\nu$ C-N + N-H wag                                                                           |     |
| 1303                         | ring expansion                                                                                |     |
| 1382                         | $\delta$ CH <sub>3</sub>                                                                      |     |
| 1456                         | C-H                                                                                           |     |
| 1505                         | C <sub>2</sub> N <sub>3</sub> + C <sub>4</sub> N <sub>3</sub> + $\nu$ C <sub>5</sub> N1 + N-H |     |

**Imdz:** imidazole

**Oop:** out of plane

**Ar:** aromatic

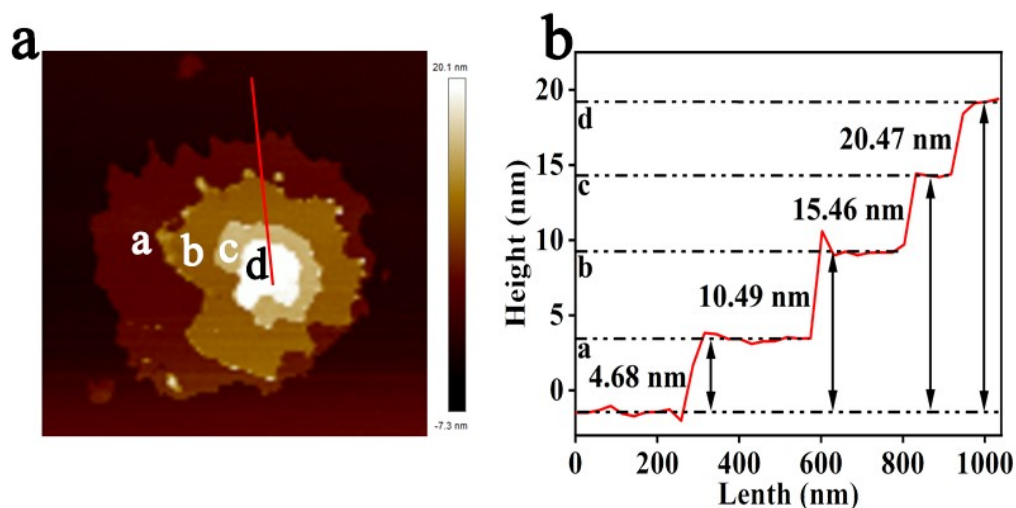

**Fig. S2** (a) AFM image of BiOCl, with red lines indicating the different regional height profiles; (b) the height profile of the red line reflects the thickness of the BiOCl NSs.

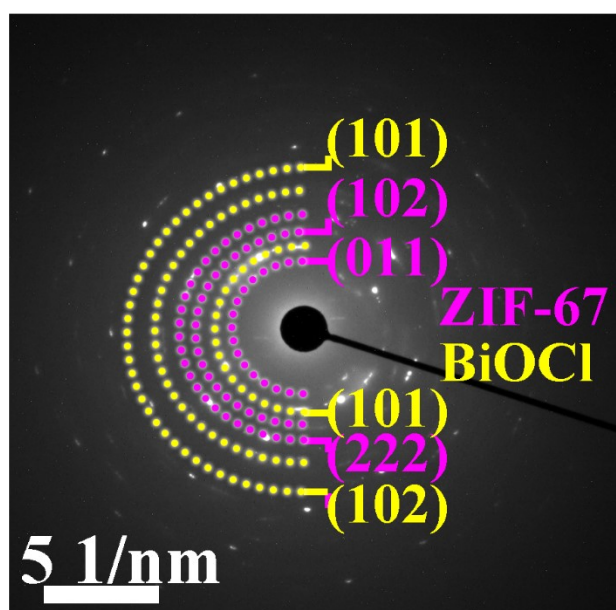

**Fig. S3** Selected area electron diffraction (SAED) of ZBO-2

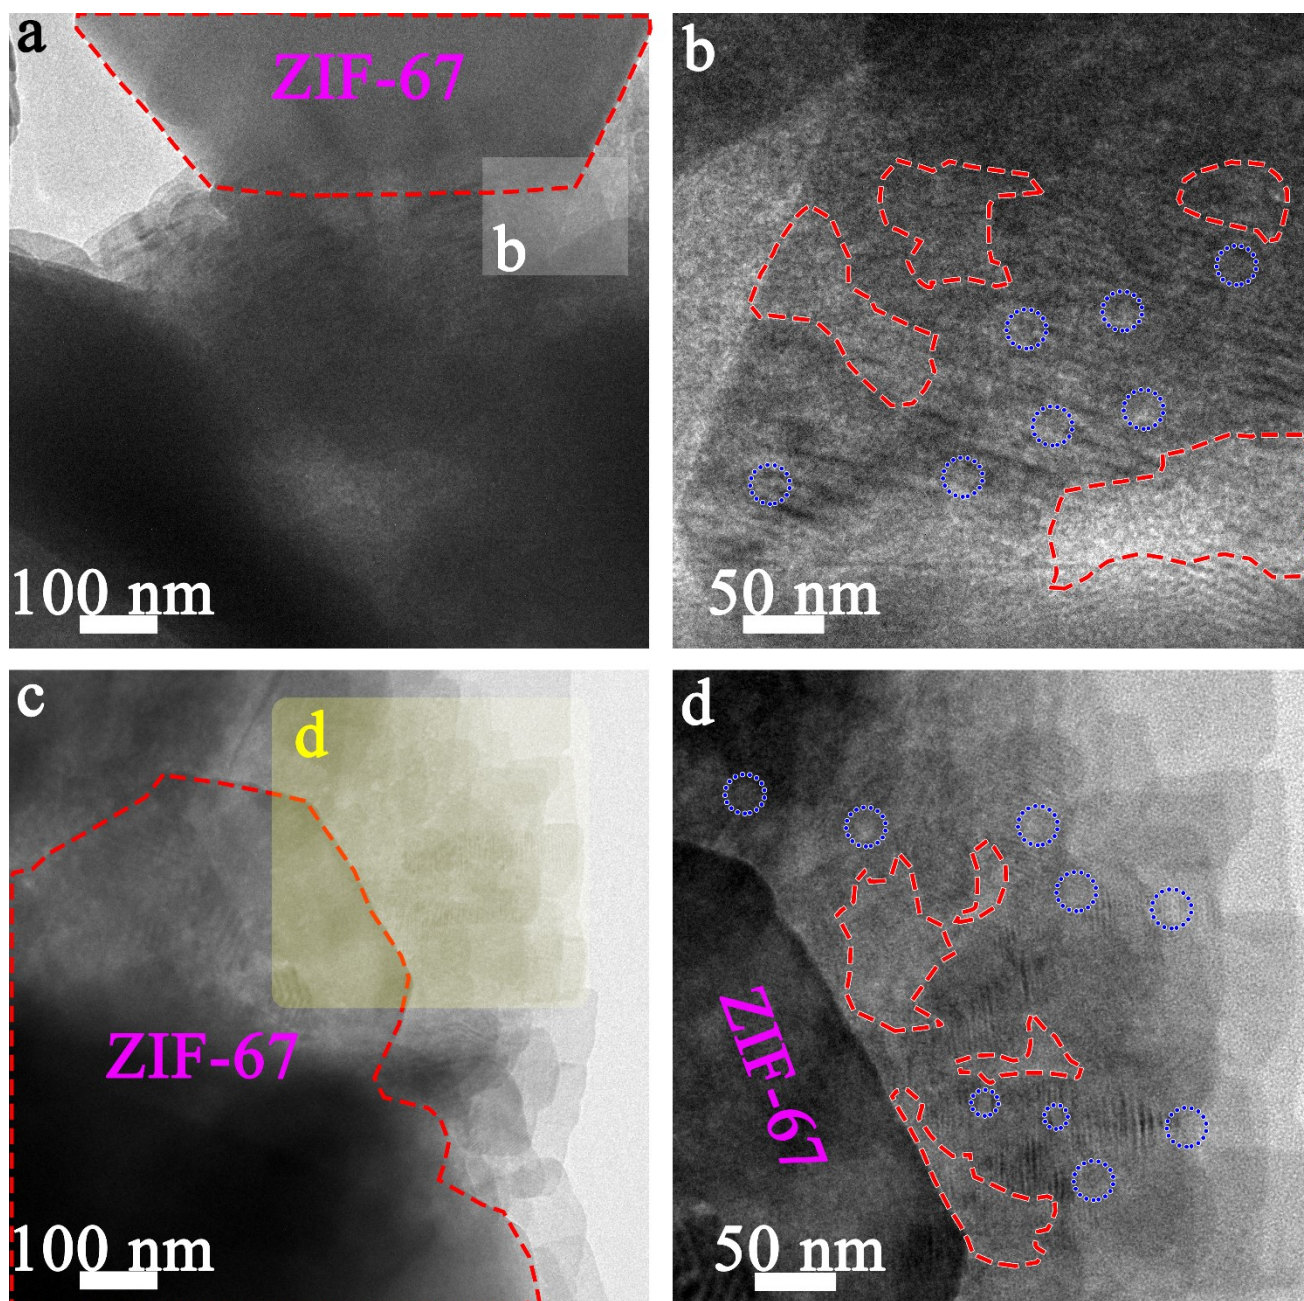

**Fig. S4.** (a-d) HRTEM images of ZBO-2 (red lines show surface defects in BiOCl NSs, blue lines indicate points defects).

**Table S4.** The XPS peak positions and peak area ratio (%) for Co

| Sample                                                | ZBO-2            |       |                  |       | ZBO-2+NO <sub>2</sub> |       |                  |       |
|-------------------------------------------------------|------------------|-------|------------------|-------|-----------------------|-------|------------------|-------|
| Peaks                                                 | Co <sup>2+</sup> |       | Co <sup>3+</sup> |       | Co <sup>2+</sup>      |       | Co <sup>3+</sup> |       |
| Binding energy (eV)                                   | 785.4            | 801.5 | 797.1            | 781.5 | 785.5                 | 802.7 | 797.7            | 781.8 |
| Peak area ratio (%)                                   | 50.3             |       | 49.7             |       | 48.9                  |       | 51.1             |       |
| Peak area ratio (Co <sup>3+</sup> /Co <sup>2+</sup> ) | 0.98             |       |                  |       | 1.04                  |       |                  |       |

**Table S5** O1s peak position and peak area ratio (%) of ZBO-2 and ZBO-2+NO<sub>2</sub> samples O<sub>l</sub>: lattice oxygen; O<sub>v</sub>: oxygen vacancy; O<sub>c</sub>: chemisorbed oxygen

| Sample              | ZBO-2          |                |                | ZBO-2+NO <sub>2</sub> |                |                |
|---------------------|----------------|----------------|----------------|-----------------------|----------------|----------------|
| Peak                | O <sub>l</sub> | O <sub>v</sub> | O <sub>c</sub> | O <sub>l</sub>        | O <sub>v</sub> | O <sub>c</sub> |
| Binding energy (eV) | 535.3          | 532.9          | 531.7          | 535.9                 | 533.4          | 532.6          |
| Peak area ratio (%) | 35.9           | 43.6           | 20.5           | 34.4                  | 39.7           | 25.9           |



| Raw materials | $R_1$ ( $\Omega$ )  | $C_1$ (F)               | $R_2$ ( $\Omega$ )  | $C_2$ (F)               |
|---------------|---------------------|-------------------------|---------------------|-------------------------|
| ZBO-1         | $4.417 \times 10^5$ | $1.207 \times 10^{-12}$ | $1.268 \times 10^6$ | $1.261 \times 10^{-10}$ |
| ZBO-2         | $4.463 \times 10^4$ | $7.015 \times 10^{-11}$ | $1.081 \times 10^6$ | $3.691 \times 10^{-11}$ |
| ZBO-3         | $5.170 \times 10^4$ | $7.088 \times 10^{-11}$ | $1.207 \times 10^6$ | $3.746 \times 10^{-11}$ |
| BiOCl         | $5.692 \times 10^7$ | $8.305 \times 10^{-12}$ | $8.377 \times 10^7$ | $5.347 \times 10^{-10}$ |

Table S6 Parameters obtained by fitting experimental curve to equivalent circuit (In-air atmosphere).

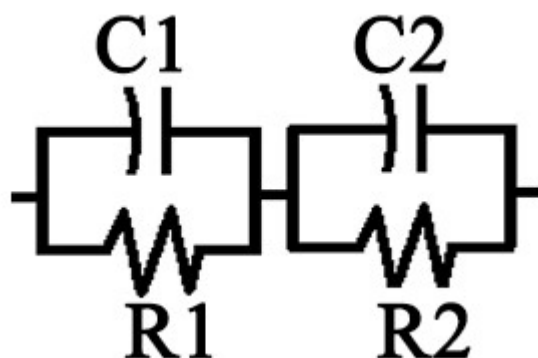

Fig. S5 The equivalent circuit model used to interpret the EIS data.

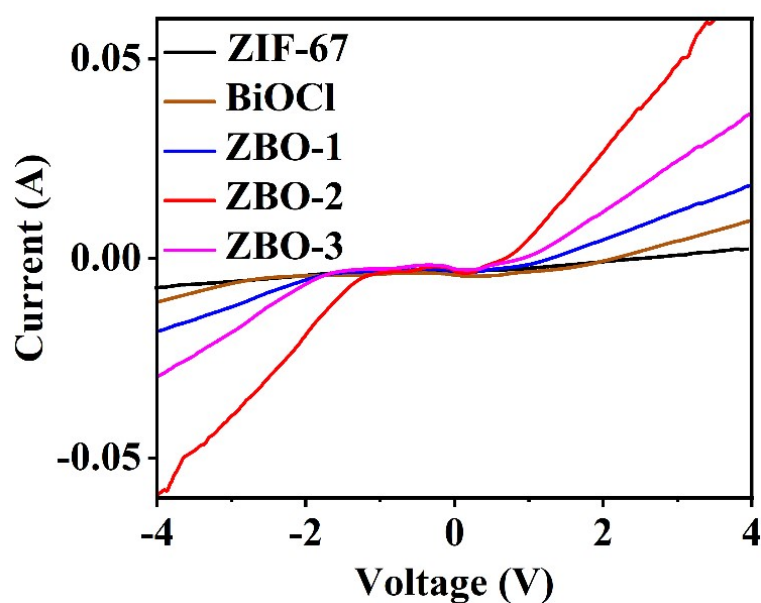

Fig. S6 Current-Voltage (I-V) behavior measured at RT in air.



**Table S7** Response, response time and recovery time of **ZBO** sensors at room temperature (RT=25 °C, RH 25%).

| Sample      | ZBO-1 |       |       | ZBO-2 |       |       | ZBO-3 |       |       | BiCOI |       |       |
|-------------|-------|-------|-------|-------|-------|-------|-------|-------|-------|-------|-------|-------|
|             | S     | T/s   | Tr/s  |
| <b>100</b>  | 40.32 | 7.98  | 41.34 | 44.81 | 7.00  | 44.00 | 42.56 | 7.58  | 43.33 | 20.54 | 7.47  | 66.98 |
| <b>50</b>   | 30.67 | 14.65 | 31.30 | 38.53 | 10.00 | 18.18 | 35.34 | 14.35 | 32.66 | 6.06  | 18.07 | 56.88 |
| <b>30</b>   | 19.28 | 18.66 | 58.67 | 24.73 | 13.58 | 17.00 | 22.41 | 17.38 | 30.91 | 3.14  | 24.25 | 50.25 |
| <b>10</b>   | 15.33 | 20.00 | 20.50 | 18.76 | 15.82 | 17.00 | 17.73 | 18.48 | 29.37 | 1.78  | 27.01 | 45.60 |
| <b>5</b>    | 9.25  | 23.70 | 15.80 | 10.47 | 16.00 | 9.00  | 9.64  | 22.00 | 27.49 | 1.59  | 29.87 | 35.08 |
| <b>3</b>    | 4.31  | 27.59 | 19.60 | 5.30  | 18.83 | 8.36  | 5.20  | 24.58 | 24.45 | 1.44  | 32.40 | 30.55 |
| <b>1</b>    | 1.88  | 28.37 | 12.50 | 1.95  | 20.00 | 7.18  | 1.90  | 26.98 | 21.26 | 1.27  | 38.47 | 20.02 |
| <b>0.5</b>  | 1.54  | 33.75 | 10.50 | 1.63  | 22.48 | 6.70  | 1.42  | 29.67 | 15.59 |       |       |       |
| <b>0.3</b>  | 1.21  | 34.66 | 8.50  | 1.40  | 25.96 | 5.24  | 1.26  | 32.58 | 10.40 |       |       |       |
| <b>0.1</b>  | 1.01  | 38.95 | 6.40  | 1.21  | 26.85 | 4.35  | 1.18  | 35.67 | 8.30  |       |       |       |
| <b>0.05</b> | 0.98  | 42.65 | 3.10  | 1.11  | 28.65 | 2.50  | 23.51 | 16.00 | 85.00 |       |       |       |

\*S: Response    T<sub>s</sub>: Response time    T<sub>r</sub>: Recovery time

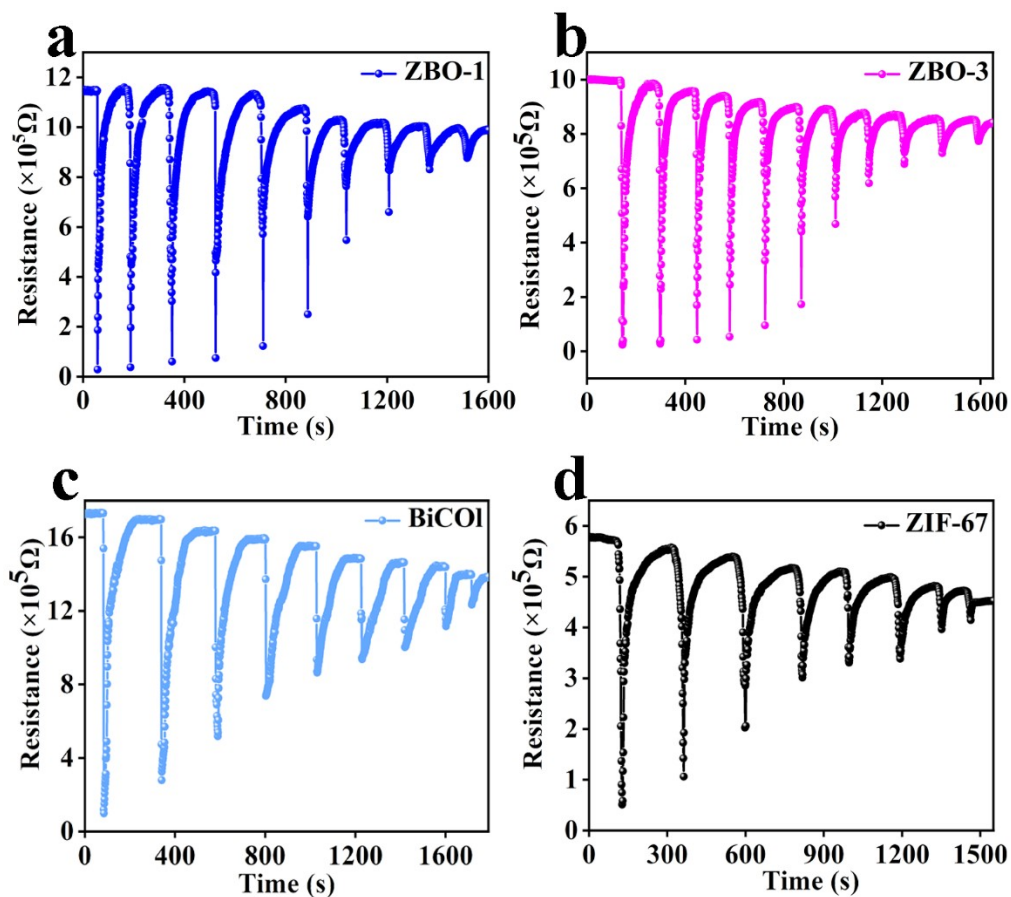

Fig. S7 Dynamic response-recovery curves of (a) ZBO-3; (b) ZBO-1; (c) BiCOI; (d) ZIF-67

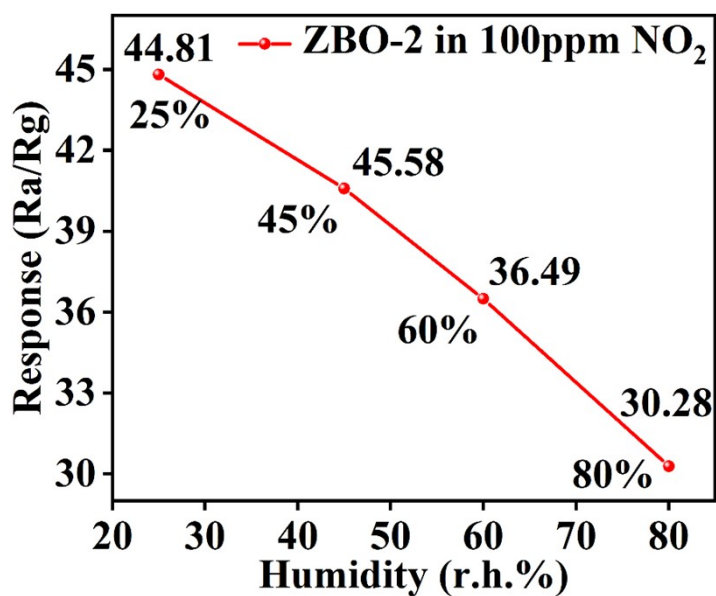

Fig. S8 Response value of ZBO-2 sensor at different humidity conditions.

### Calculation for limit of detection (LOD):

The noise of the sensor is calculated using the change in the relative response of the sensor over the baseline (root mean square deviation) <sup>14-16</sup>. According to Eq. (1) below, and  $S_i$  and  $S$  obtained by polynomial fitting method in Figure 6a,  $[V_x]^2$  can be collected. According to Eq. (2), the sensor noise is 0.00189, and according to Eq. (3), the theoretical detection limit (for a signal-to-noise ratio of 3) is about 10 ppb. Therefore, the theoretical detection limit of 10 ppb to  $\text{NO}_2$  at RT.

$$V_x^2 = \sum (S_i - S)^2 \quad (1)$$

$$rms = \sqrt{\frac{V_x^2}{N}} \quad (N = 50)$$

$$LOD = 3 * \left( \frac{rms}{slope} \right) \quad (3)$$

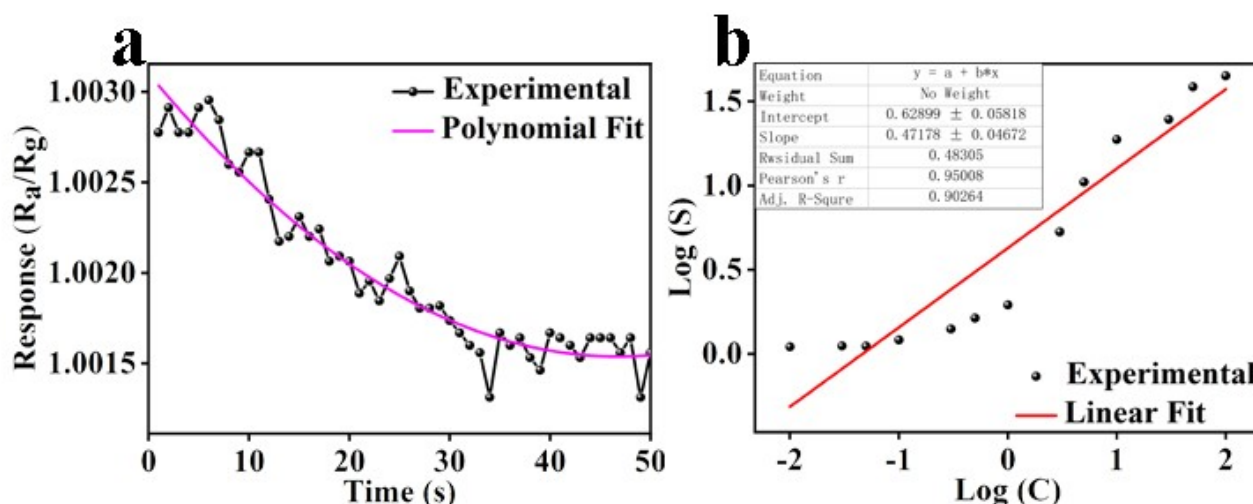

**Fig. S9** (a) The curve obtained by fifth-order polynomial fitting the first 50 response points in the response-time baseline of the ZBO-2 sensor before the injection of  $\text{NO}_2$ . The response values before and after fitting are recorded as  $Y_i$  and  $Y$ , respectively; (b) the curve with detailed data obtained by linear fitting the response points in the  $\text{NO}_2$  sensing measurement of Figure 6a.

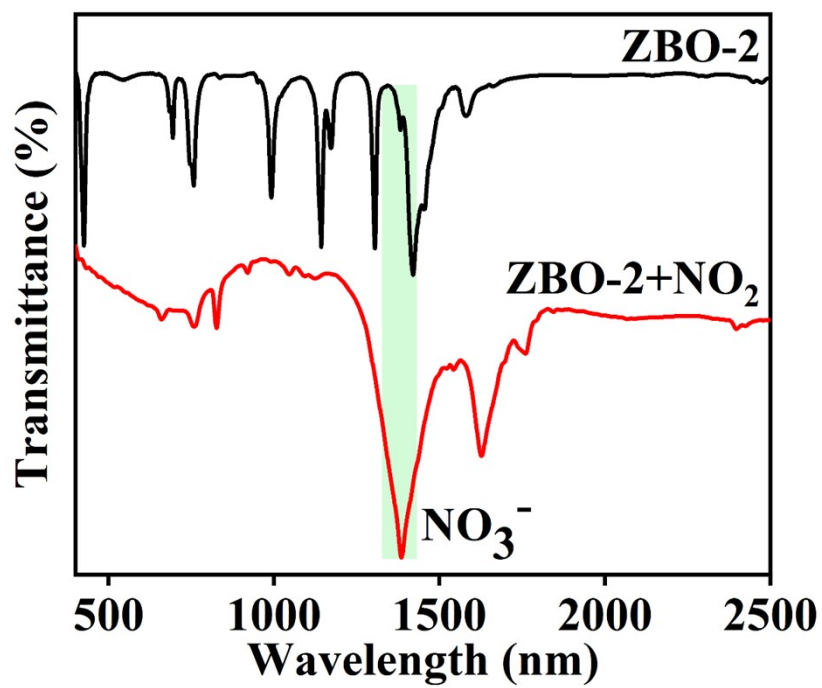

**Fig. S10** FT-IR spectra for ZBO-2 composite in air and exposed to NO<sub>2</sub> at RT.

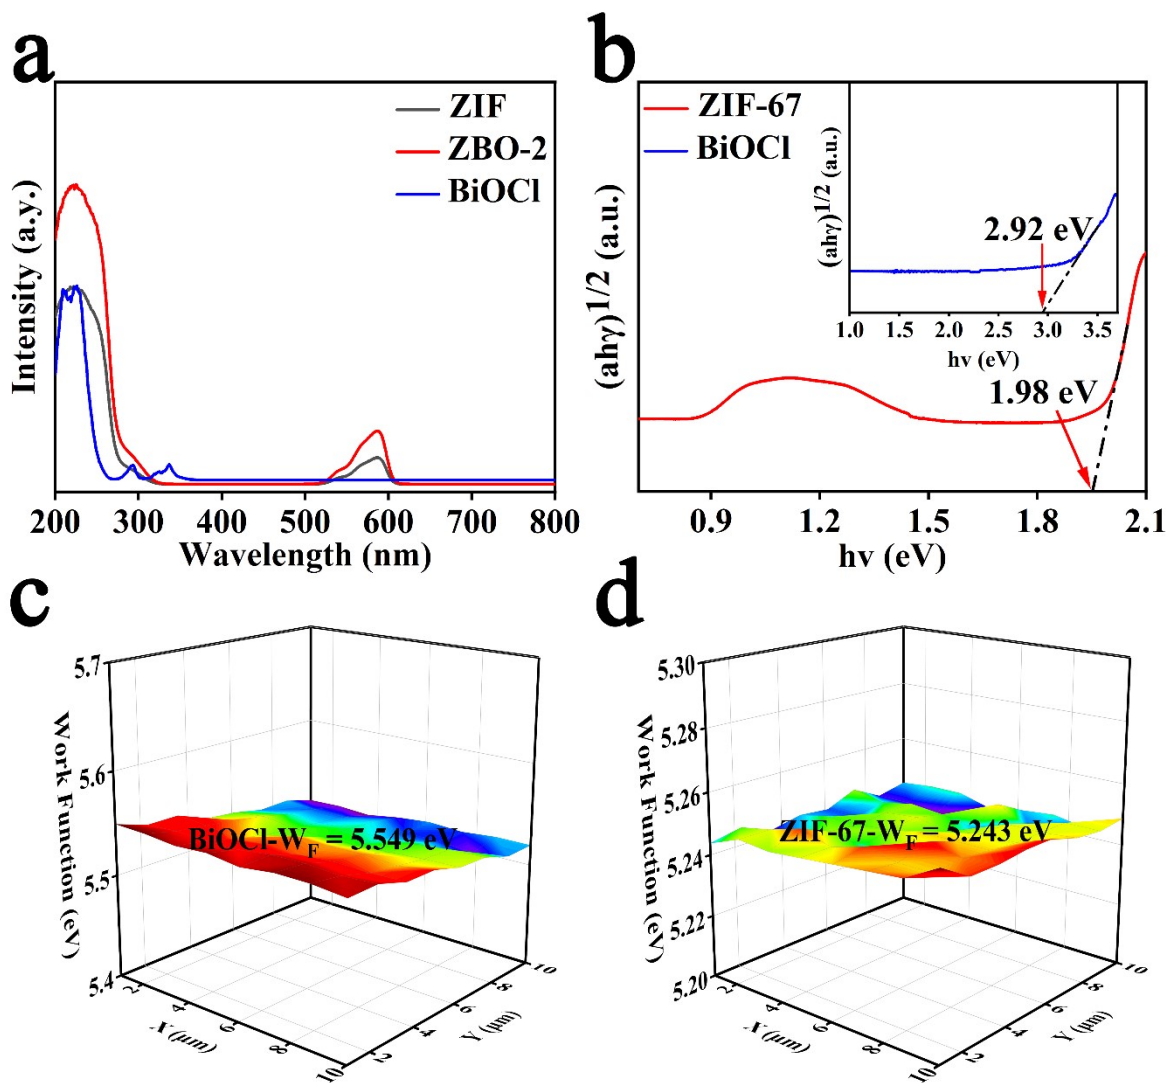

**Fig. S11** (a and b) Uv-vis diffuse reflectance spectra of BiOCl, ZIF-67, and ZBO-2 (the energy value at the intersection of tangent and the horizontal axis is the optical band gap); (c and d) Kelvin probe scheme for pure ZIF-67 and BiOCl NSs.

## References

1. Ullah, M.; Bai, X.; Chen, J.; Lv, H.; Liu, Z.; Zhang, Y.; Wang, J.; Sun, B.; Li, L.; Shi, K., Metal-organic framework material derived  $\text{Co}_3\text{O}_4$  coupled with graphitic carbon nitride as highly sensitive  $\text{NO}_2$  gas sensor at room temperature. *Colloids and Surfaces A: Physicochemical and Engineering Aspects* **2021**, *612*, 125972.
2. Zhan, M.; Ge, C.; Hussain, S.; Alkorbi, A. S.; Alsaiani, R.; Alhemiary, N. A.; Qiao, G.; Liu, G., Enhanced  $\text{NO}_2$  gas-sensing performance by core-shell  $\text{SnO}_2/\text{ZIF-8}$  nanospheres. *Chemosphere* **2022**, *291*, 132842.
3. Liu, Y.; Wang, R.; Zhang, T.; Liu, S.; Fei, T., Zeolitic imidazolate framework-8 (ZIF-8)-coated  $\text{In}_2\text{O}_3$  nanofibers as an efficient sensing material for ppb-level  $\text{NO}_2$  detection. *J Colloid Interface Sci* **2019**, *541*, 249-257.
4. Michel, C. R.; López Contreras, N. L.; Martínez-Preciado, A. H.,  $\text{CO}_2$  and  $\text{CO}$  gas sensing properties of nanostructured  $\text{BiOCl}$  ribbons doped with gold nanoparticles. *Sensors and Actuators B: Chemical* **2012**, *173*, 100-105.
5. Michel, C. R.; Contreras, N. L. L.; Martínez-Preciado, A. H., Gas sensing properties of nanostructured bismuth oxychloride. *Sensors and Actuators B: Chemical* **2011**, *160*, 271-277.
6. Navale, S. T.; Yang, Z.; Liu, C.; Kumar, A.; Sharma, G.; Cao, P.; Patil, V. B.; Stadler, F. J., Solid-state synthesis strategy of hierarchically-structured  $\text{BiOCl}$  desert-roses for the selective detection of  $\text{C}_2\text{H}_5\text{OH}$ . *Journal of Alloys and Compounds* **2019**, *778*, 532-541.
7. Oum, W.; Mirzaei, A.; Hussain, T.; Bang, J. H.; Han, S.; Shin, K. Y.; Yu, D. J.; Kang, S.; Kaewmaraya, T.; Kim, S. S.; Kim, H. W., Room temperature  $\text{NO}_2$  sensing performance of a-C-decorated  $\text{TeO}_2$  nanowires. *Sensors and Actuators B: Chemical* **2022**, *363*, 131853.
8. Pasupuleti, K. S.; Reddeppa, M.; Chougule, S. S.; Bak, N. H.; Nam, D. J.; Jung, N.; Cho, H. D.; Kim, S. G.; Kim, M. D., High performance langasite based SAW  $\text{NO}_2$  gas sensor using 2D g- $\text{C}_3\text{N}_4@/\text{TiO}_2$  hybrid nanocomposite. *J Hazard Mater* **2022**, *427*, 128174.
9. Tyagi, S.; Kumar, A.; Kumar, A.; Gautam, Y. K.; Kumar, V.; Kumar, Y.; Singh, B. P., Enhancement in the sensitivity and selectivity of Cu functionalized  $\text{MoS}_2$  nanoworm thin films for nitrogen dioxide gas sensor. *Materials Research Bulletin* **2022**, *150*, 111784.
10. Han, D.; Han, X.; Liu, L.; Li, D.; Liu, Y.; Liu, Z.; Liu, D.; Chen, Y.; Zhuo, K.; Sang, S., Sub-



ppb-Level Detection of Nitrogen Dioxide Based on High-Quality Black Phosphorus. *ACS Appl Mater Interfaces* **2022**, *14*, 13942-13951.

11. Ni, M.; Han, S.; Liang, Z.; Liu, S.; Zhang, X.; Hussain, S.; Wang, M.; Qiao, G.; Liu, G., Enhanced room-temperature NO<sub>2</sub> sensing performance of mulberry-like Cu<sub>2</sub>O/CuO composites. *Sensors and Actuators A: Physical* **2023**, *350*, 114136.
12. Liang, Z.; Zhang, X.; Yang, J.; Cheng, Y.; Hou, H.; Hussain, S.; Liu, J.; Qiao, G.; Liu, G., Facile fabrication of nanoflower-like WO<sub>3</sub>/WS<sub>2</sub> heterojunction for highly sensitive NO<sub>2</sub> detection at room temperature. *J Hazard Mater* **2023**, *443* (1), 130316.
13. Usov, P. M.; McDonnell-Worth, C.; Zhou, F.; MacFarlane, D. R.; D'Alessandro, D. M., The Electrochemical Transformation of the Zeolitic Imidazolate Framework ZIF-67 in Aqueous Electrolytes. *Electrochimica Acta* **2015**, *153*, 433-438.
14. Dua, V.; Surwade, S. P.; Ammu, S.; Agnihotra, S. R.; Jain, S.; Roberts, K. E.; Park, S.; Ruoff, R. S.; Manohar, S. K., All-organic vapor sensor using inkjet-printed reduced graphene oxide. *Angew Chem Int Ed Engl* **2010**, *49*, 2154-7.
15. Gu, W.; Yang, L.; Teng, F.; Abiden, Z. U.; Zhao, F., Investigation on Different Electrochemical Behaviors of Four-Layered Bismuth Oxyhalogens. *Energy Technology* **2019**, *7*, 1900460.
16. Li, M.; Zhou, D.; Zhao, J.; Zheng, Z.; He, J.; Hu, L.; Xia, Z.; Tang, J.; Liu, H., Resistive gas sensors based on colloidal quantum dot (CQD) solids for hydrogen sulfide detection. *Sensors and Actuators B: Chemical* **2015**, *217*, 198-201.
